# Supplementary material
Source: Research Square preprint supplement (doi:10.21203/rs.3.rs-9410031/v1)
Supplement: Supplementary file 1 [file 700c2f7097f0a779d1e941ec.pdf]

|                                                                      | Inner South West - 66194 | Blacktown - 67019     | City and Inner South - 66037 | Northern Beaches - 66059 | Outer South West - 68257 | Outer West and Blue Mountains - 67113 | Parramatta - 66124    | South West - 67108    |
|----------------------------------------------------------------------|--------------------------|-----------------------|------------------------------|--------------------------|--------------------------|---------------------------------------|-----------------------|-----------------------|
| Maximum Temperature, Multivariate                                    | 1.006 (1.002 - 1.011)    | 1.008 (0.999 - 1.016) | 1.008 (1.005 - 1.012)        | 1.009 (1.005 - 1.014)    | 1.004 (1.000 - 1.008)    | 1.007 (1.004 - 1.011)                 | 1.007 (1.004 - 1.011) | 1.004 (0.999 - 1.009) |
| Maximum temperature lagged, multivariate                             |                          |                       |                              |                          |                          |                                       |                       |                       |
| Maximum Temperature, lag 1-week                                      | not sig                  | 1.009 (0.999 - 1.019) | 1.010 (1.004 - 1.016)        | not sig                  | not sig                  | 1.006 (0.999 - 1.013)                 | 1.007 (1.000 - 1.013) | not sig               |
| Maximum Temperature, lag 2-week                                      | not sig                  | not sig               | not sig                      | not sig                  | not sig                  | not sig                               | not sig               | not sig               |
| Maximum Temperature, lag 3-week                                      | not sig                  | not sig               | not sig                      | not sig                  | not sig                  | not sig                               | not sig               | not sig               |
| Maximum Temperature, lag 4-week                                      | not sig                  | not sig               | not sig                      | not sig                  | not sig                  | not sig                               | not sig               | 1.006 (0.999 - 1.012) |
| Maximum temperature percentiles, multivariate                        |                          |                       |                              |                          |                          |                                       |                       |                       |
| Maximum Temperature, 91 <sup>st</sup> Percentile                     | not sig                  | 1.345 (1.100 - 1.636) | not sig                      | 0.808 (0.658 - 0.988)    | not sig                  | not sig                               | not sig               | not sig               |
| Maximum Temperature, 92 <sup>nd</sup> Percentile                     | not sig                  | not sig               | not sig                      | not sig                  | not sig                  | not sig                               | not sig               | not sig               |
| Maximum Temperature, 93 <sup>rd</sup> Percentile                     | not sig                  | 0.826 (0.648 - 1.041) | not sig                      | 1.177 (0.982 - 1.408)    | not sig                  | 1.268 (1.084 - 1.484)                 | not sig               | not sig               |
| Maximum Temperature, 94 <sup>th</sup> Percentile                     | not sig                  | not sig               | not sig                      | not sig                  | not sig                  | not sig                               | not sig               | 1.245 (1.068 - 1.451) |
| Maximum Temperature, 95 <sup>th</sup> Percentile                     | not sig                  | not sig               | not sig                      | not sig                  | not sig                  | not sig                               | not sig               | not sig               |
| Maximum Temperature, 96 <sup>th</sup> Percentile                     | not sig                  | not sig               | not sig                      | 1.254 (1.050 - 1.496)    | not sig                  | not sig                               | not sig               | not sig               |
| Maximum Temperature, 97 <sup>th</sup> Percentile                     | not sig                  | not sig               | not sig                      | not sig                  | not sig                  | not sig                               | not sig               | not sig               |
| Maximum Temperature, 98 <sup>th</sup> Percentile                     | not sig                  | 1.243 (1.011 - 1.520) | not sig                      | not sig                  | not sig                  | 0.893 (0.753 - 1.059)                 | not sig               | not sig               |
| Maximum Temperature, 99 <sup>th</sup> Percentile                     | not sig                  | not sig               | not sig                      | not sig                  | not sig                  | not sig                               | not sig               | not sig               |
| Maximum Temperature, >99 <sup>th</sup> Percentile                    | not sig                  | not sig               | not sig                      | not sig                  | not sig                  | not sig                               | not sig               | not sig               |
| Minimum Temperature Multivariate                                     | 1.007 (1.003 - 1.010)    | not sig               | 1.008 (1.005 - 1.011)        | 1.010 (1.005 - 1.016)    | 1.005 (1.001 - 1.008)    | 1.009 (1.006 - 1.013)                 | 1.006 (1.003 - 1.010) | 1.005 (1.001 - 1.009) |
| Minimum temperature lagged, multivariate                             |                          |                       |                              |                          |                          |                                       |                       |                       |
| Minimum Temperature, lag 1-week                                      | not sig                  | 1.010 (0.999 - 1.020) | 1.016 (1.007 - 1.024)        | not sig                  | not sig                  | 1.013 (1.005 - 1.021)                 | 1.013 (1.005 - 1.021) | not sig               |
| Minimum Temperature, lag 2-weeks                                     | 1.006 (0.999 - 1.012)    | not sig               | not sig                      | 1.010 (0.998 - 1.023)    | not sig                  | not sig                               | not sig               | not sig               |
| Minimum Temperature, lag 3-weeks                                     | not sig                  | not sig               | not sig                      | not sig                  | 0.992 (0.984 - 1.000)    | not sig                               | not sig               | not sig               |
| Minimum Temperature, lag 4-weeks                                     | not sig                  | 1.009 (0.999 - 1.019) | 0.992 (0.984 - 0.999)        | not sig                  | not sig                  | not sig                               | not sig               | not sig               |
| Minimum temperature percentiles (>90), multivariate                  |                          |                       |                              |                          |                          |                                       |                       |                       |
| Minimum Temperature, 91 <sup>st</sup> Percentile                     | 1.148 (1.025 - 1.284)    | not sig               | not sig                      | 1.260 (1.055 - 1.503)    | not sig                  | not sig                               | not sig               | not sig               |
| Minimum Temperature, 92 <sup>nd</sup> Percentile                     | not sig                  | not sig               | not sig                      | not sig                  | not sig                  | not sig                               | not sig               | not sig               |
| Minimum Temperature, 93 <sup>rd</sup> Percentile                     | not sig                  | not sig               | not sig                      | not sig                  | not sig                  | not sig                               | not sig               | not sig               |
| Minimum Temperature, 94 <sup>th</sup> Percentile                     | not sig                  | not sig               | not sig                      | not sig                  | not sig                  | not sig                               | not sig               | 0.873 (0.751 - 1.016) |
| Minimum Temperature, 95 <sup>th</sup> Percentile                     | not sig                  | not sig               | not sig                      | not sig                  | not sig                  | not sig                               | not sig               | 0.905 (0.746 - 1.098) |
| Minimum Temperature, 96 <sup>th</sup> Percentile                     | not sig                  | not sig               | not sig                      | not sig                  | not sig                  | not sig                               | not sig               | not sig               |
| Minimum Temperature, 97 <sup>th</sup> Percentile                     | 1.165 (1.053 - 1.287)    | not sig               | not sig                      | 0.840 (0.663 - 1.056)    | not sig                  | not sig                               | not sig               | not sig               |
| Minimum Temperature, 98 <sup>th</sup> Percentile                     | not sig                  | not sig               | not sig                      | not sig                  | not sig                  | not sig                               | 1.166 (1.004 - 1.353) | not sig               |
| Minimum Temperature, 99 <sup>th</sup> Percentile                     | not sig                  | not sig               | not sig                      | not sig                  | not sig                  | 1.187 (0.993 - 1.421)                 | not sig               | not sig               |
| Minimum Temperature, >99 <sup>th</sup> Percentile                    | not sig                  | 1.222 (1.028 - 1.448) | not sig                      | not sig                  | not sig                  | not sig                               | not sig               | 0.963 (0.831 - 1.116) |
| Minimum temperature percentiles (<10), multivariate with confounders |                          |                       |                              |                          |                          |                                       |                       |                       |
| Minimum Temperature, 1 <sup>st</sup> Percentile                      | not sig                  | not sig               | not sig                      | not sig                  | not sig                  | not sig                               | not sig               | 1.204 (0.971 - 1.493) |
| Minimum Temperature, 2 <sup>nd</sup> Percentile                      | not sig                  | not sig               | not sig                      | not sig                  | 1.277 (1.025 - 1.591)    | not sig                               | not sig               | not sig               |
| Minimum Temperature, 3 <sup>rd</sup> Percentile                      | not sig                  | not sig               | not sig                      | not sig                  | 1.255 (1.007 - 1.565)    | not sig                               | not sig               | not sig               |
| Minimum Temperature, 4 <sup>th</sup> Percentile                      | not sig                  | not sig               | not sig                      | 1.284 (0.996 - 1.656)    | not sig                  | not sig                               | not sig               | not sig               |
| Minimum Temperature, 5 <sup>th</sup> Percentile                      | not sig                  | not sig               | not sig                      | not sig                  | not sig                  | not sig                               | not sig               | not sig               |
| Minimum Temperature, 6 <sup>th</sup> Percentile                      | not sig                  | not sig               | not sig                      | not sig                  | 1.186 (0.961 - 1.465)    | not sig                               | not sig               | not sig               |
| Minimum Temperature, 7 <sup>th</sup> Percentile                      | not sig                  | not sig               | not sig                      | not sig                  | 1.282 (1.030 - 1.598)    | not sig                               | not sig               | not sig               |
| Minimum Temperature, 8 <sup>th</sup> Percentile                      | not sig                  | not sig               | not sig                      | not sig                  | 1.239 (0.994 - 1.546)    | not sig                               | not sig               | not sig               |
| Minimum Temperature, 9 <sup>th</sup> Percentile                      | not sig                  | 1.214 (0.901 - 1.634) | 1.224 (1.005 - 1.491)        | not sig                  | not sig                  | not sig                               | not sig               | not sig               |
| Heatwaves, multivariate                                              |                          |                       |                              |                          |                          |                                       |                       |                       |
| 2015 Heatwave                                                        | not sig                  | not sig               | 0.946 (0.893 - 1.003)        | not sig                  | not sig                  | not sig                               | 0.920 (0.861 - 0.984) | 0.932 (0.870 - 0.999) |
| 2016 Heatwave                                                        | not sig                  | not sig               | not sig                      | not sig                  | not sig                  | not sig                               | not sig               | not sig               |
| 2017 Heatwave                                                        | not sig                  | not sig               | 0.940 (0.887 - 0.997)        | 1.128 (1.037 - 1.228)    | not sig                  | 0.920 (0.787 - 0.978)                 | not sig               | 0.883 (0.823 - 0.946) |
| 2018 Heatwave                                                        | not sig                  | not sig               | 1.065 (1.006 - 1.129)        | 1.258 (1.158 - 1.366)    | 1.191 (1.047 - 1.222)    | 0.783 (0.732 - 0.838)                 | not sig               | 1.097 (1.024 - 1.176) |
| 2019 Heatwave                                                        | not sig                  | not sig               | 1.098 (1.044 - 1.171)        | 1.251 (1.152 - 1.360)    | 1.139 (1.055 - 1.231)    | 0.769 (0.719 - 0.823)                 | 1.067 (0.999 - 1.139) | 1.132 (1.057 - 1.215) |
| 2020 Heatwave                                                        | 0.942 (0.893 - 0.994)    | not sig               | 1.125 (1.052 - 1.191)        | 1.218 (1.129 - 1.322)    | 1.109 (1.027 - 1.197)    | 0.745 (0.695 - 0.800)                 | 1.122 (1.052 - 1.198) | 1.066 (0.996 - 1.141) |
| 2021 Heatwave                                                        | 0.939 (0.890 - 0.992)    | not sig               | 1.185 (1.129 - 1.254)        | 1.094 (1.006 - 1.190)    | not sig                  | 0.805 (0.752 - 0.863)                 | 1.105 (1.036 - 1.180) | not sig               |
| 2022 Heatwave (first 6 months only)                                  | 0.930 (0.870 - 0.993)    | not sig               | 1.156 (1.080 - 1.238)        | not sig                  | not sig                  | 0.710 (0.650 - 0.775)                 | 1.104 (1.021 - 1.193) | 0.879 (0.807 - 0.956) |
| Any Heatwave in Summer                                               | not sig                  | not sig               | not sig                      | not sig                  | not sig                  | not sig                               | not sig               | not sig               |
| Any Heatwave in Autumn                                               | not sig                  | 1.199 (0.980 - 1.457) | not sig                      | not sig                  | not sig                  | not sig                               | not sig               | not sig               |
| Any Heatwave in Winter                                               | NA                       | NA                    | NA                           | NA                       | NA                       | NA                                    | NA                    | NA                    |
| Any Heatwave in Spring                                               | not sig                  | not sig               | not sig                      | not sig                  | not sig                  | 1.145 (0.997 - 1.312)                 | not sig               | not sig               |
| Any Heatwave, Multivariate                                           | not sig                  | not sig               | not sig                      | not sig                  | not sig                  | not sig                               | 1.077 (0.990 - 1.172) | 0.933 (0.869 - 1.002) |
| Any Heatwave Days, Multivariate                                      | 1.016 (0.999 - 1.032)    | not sig               | 1.025 (0.998 - 1.053)        | 1.036 (1.012 - 1.061)    | not sig                  | 1.022 (1.004 - 1.040)                 | 1.027 (1.007 - 1.048) | not sig               |
| Heatwaves, Weekly lagged, multivariate                               |                          |                       |                              |                          |                          |                                       |                       |                       |
| Any heatwave, 1wk lag                                                | not sig                  | not sig               | not sig                      | not sig                  | not sig                  | 0.874 (0.770 - 0.993)                 | 0.887 (0.781 - 1.007) | not sig               |
| Any heatwave, 2wk lag                                                | not sig                  | not sig               | not sig                      | not sig                  | not sig                  | not sig                               | not sig               | not sig               |
| Any heatwave, 3wk lag                                                | not sig                  | not sig               | not sig                      | not sig                  | not sig                  | 0.846 (0.743 - 0.963)                 | not sig               | not sig               |
| Any heatwave, 4wk lag                                                | not sig                  | not sig               | not sig                      | not sig                  | not sig                  | 0.815 (0.717 - 0.926)                 | not sig               | not sig               |
| Heatwave days, 1wk lag                                               | not sig                  | 1.028 (0.998 - 1.059) | not sig                      | 1.042 (1.010 - 1.076)    | not sig                  | 1.048 (1.015 - 1.083)                 | 1.050 (1.019 - 1.082) | not sig               |
| Heatwave days, 2wk lag                                               | not sig                  | not sig               | not sig                      | not sig                  | not sig                  | 1.031 (0.998 - 1.065)                 | not sig               | not sig               |
| Heatwave days, 3wk lag                                               | not sig                  | not sig               | not sig                      | 1.029 (0.997 - 1.062)    | not sig                  | 1.033 (0.999 - 1.067)                 | not sig               | not sig               |
| Heatwave days, 4wk lag                                               | not sig                  | not sig               | not sig                      | 1.041 (1.008 - 1.074)    | not sig                  | 1.055 (1.021 - 1.089)                 | not sig               | not sig               |

p<0.001  
p<0.01  
p<0.05  
p<0.1  
not sig  
NA

| Green Space 2019                                                 | Inner South West - 66194 | Blacktown - 67019 | City and Inner South - 66037 | Northern Beaches - 66059 | Outer South West - 68257 | Outer West and Blue Mountains - 67113 | Parramatta - 66124    | South West - 67108 |
|------------------------------------------------------------------|--------------------------|-------------------|------------------------------|--------------------------|--------------------------|---------------------------------------|-----------------------|--------------------|
| <b>Maximum temperature</b>                                       |                          |                   |                              |                          |                          |                                       |                       |                    |
| Maximum Temperature, holding Greenspace constant + multivariates | 1.009 (0.999 - 1.020)    | NA                | 1.013 (1.006 - 1.020)        | not sig                  | 1.014 (1.005 - 1.024)    | 1.010 (1.002 - 1.018)                 | 1.014 (1.006 - 1.022) | not sig            |
| <b>Minimum Temperature</b>                                       |                          |                   |                              |                          |                          |                                       |                       |                    |
| Minimum Temperature, holding Greenspace constant + multivariates | not sig                  | NA                | 1.014 (1.007 - 1.022)        | not sig                  | 1.012 (1.003 - 1.021)    | 1.012 (1.005 - 1.020)                 | 1.014 (1.006 - 1.022) | not sig            |
| <b>Heatwaves</b>                                                 |                          |                   |                              |                          |                          |                                       |                       |                    |
| Any Heatwave, holding Greenspace Constant + multivariates        | not sig                  | NA                | not sig                      | not sig                  | not sig                  | not sig                               | not sig               | not sig            |
| Heatwave Days, holding Greenspace constant + multivariates       | not sig                  | NA                | not sig                      | not sig                  | not sig                  | 1.048 (1.009 - 1.088)                 | 1.037 (0.997 - 1.078) | not sig            |

|         |
|---------|
| p<0.001 |
| p<0.01  |
| p<0.05  |
| p<0.1   |
| not sig |
| NA      |

| Green Space 2022                                                 | Inner South West - 66194 | Blacktown - 67019 | City and Inner South - 66037 | Northern Beaches - 66059 | Outer South West - 68257 | Outer West and Blue Mountains - 67113 | Parramatta - 66124 | South West - 67108 |
|------------------------------------------------------------------|--------------------------|-------------------|------------------------------|--------------------------|--------------------------|---------------------------------------|--------------------|--------------------|
| <b>Maximum temperature</b>                                       |                          |                   |                              |                          |                          |                                       |                    |                    |
| Maximum Temperature, holding Greenspace constant + multivariates | not sig                  | NA                | not sig                      | not sig                  | not sig                  | not sig                               | not sig            | not sig            |
| <b>Minimum Temperature</b>                                       |                          |                   |                              |                          |                          |                                       |                    |                    |
| Minimum Temperature, holding Greenspace constant + multivariates | not sig                  | NA                | not sig                      | not sig                  | not sig                  | not sig                               | not sig            | not sig            |
| <b>Heatwaves</b>                                                 |                          |                   |                              |                          |                          |                                       |                    |                    |
| Any Heatwave, holding Greenspace Constant + multivariates        | NA                       | NA                | NA                           | NA                       | NA                       | NA                                    | NA                 | NA                 |
| Heatwave Days, holding Greenspace constant + multivariates       | not sig                  | NA                | NA                           | not sig                  | 1.308 (1.067 - 1.598)    | not sig                               | not sig            | not sig            |

|         |
|---------|
| p<0.001 |
| p<0.01  |
| p<0.05  |
| p<0.1   |
| not sig |
| NA      |

|                       | Inner South West - 66194 | Blacktown - 67019 | City and Inner South - 66037 | Northern Beaches - 66059 | Outer South West - 68257 | Outer West and Blue Mountains - 67113 | Parramatta - 66124 | South West - 67108 |
|-----------------------|--------------------------|-------------------|------------------------------|--------------------------|--------------------------|---------------------------------------|--------------------|--------------------|
| <b>Greenspace DID</b> |                          |                   |                              |                          |                          |                                       |                    |                    |
| Interaction effect    | not sig                  | NA                | not sig                      | not sig                  | 0.984 (0.968 - 1.001)    | not sig                               | not sig            | not sig            |

|         |
|---------|
| p<0.001 |
| p<0.01  |
| p<0.05  |
| p<0.1   |
| not sig |
| NA      |
