# Supplementary material
Source: Research Square preprint supplement (doi:10.21203/rs.3.rs-9410031/v1)
Supplement: Supplementary file 2 [file 8858e3b14b1ea594d0af02bd.docx]

Table 2. Linking SEED, Air quality, and SEIFA suburb references to AIHW SA4 regions and BOM weather stations, including exclusion explanation if relevant

| SA4 Code | SA4 Name | Sydney Metropolitan Boundaries | BOM Station  Number | BOM Station Name | SEED Suburb Reference | Air quality suburb reference | SEIFA suburb name |
| --- | --- | --- | --- | --- | --- | --- | --- |
| 116 | Sydney - Blacktown | Sydney Central (Western) | 67019 | Prospect Reservoir | Prospect | Prospect | Prospect (NSW) |
| 117 | Sydney – City and Inner South | Sydney Eastern – Sydney City | 66037 | Sydney Airport AMO | Mascot | Alexandria (data not included due to incompleteness) | Mascot |
| 119 | Sydney – Inner South West | Sydney Eastern and South | 66194 | Canterbury Racecourse AWS | Canterbury | Earlwood | Canterbury (NSW) |
| 122 | Sydney – Northern Beaches | Sydney North | 66059 | Terrey Hills AWS | Terrey Hills | No data available in this area | Terrey Hills |
| 123 | Sydney – Outer South West | Sydney Western | 68257 | Campbelltown (Mount Annan) | Campbelltown | Campbelltown West | Campbelltown |
| 124 | Sydney – Outer West and Blue Mountains | Sydney Western | 67113 | Penrith Lakes AWS | Penrith | Penrith | Penrith |
| 125 | Sydney – Parramatta | Sydney Central (GPOP) | 66124 | Parramatta North (Masons Drive) | North Parramatta | Parramatta (data not included due to incompleteness) | North Parramatta |
| 127 | Sydney – South West | Sydney Western | 67108 | Badgerys Creek AWS | Badgerys Creek | Bringelly | Badgerys Creek |
