# Supplementary material
Source: Research Square preprint supplement (doi:10.21203/rs.3.rs-9410031/v1)
Supplement: Supplementary file 3 [file d093c81de566d3ed8e090dea.docx]

Table 1. Linking AIHW SA4 regions to BOM weather stations, including explanation for inclusion or exclusion

| SA4 Code | SA4 Name | BOM Station Number | BOM Station Name | Years of BOM Data | Included (Y/N) | Reason |
| --- | --- | --- | --- | --- | --- | --- |
| 115 | Sydney - Baulkham Hills and Hawkesbury |  |  |  | N | No BOM weather station in this SA4 |
| 116 | Sydney - Blacktown | 67019 | PROSPECT RESERVOIR | 2007 - 2024 | Y | Only weather station available for Blacktown SA4 116 |
| 117 | Sydney - City and Inner South | 66037 | SYDNEY AIRPORT AMO | 2007 - 2024 | Y | Only complete weather station available for City and Inner South SA4 117 |
| 117 | Sydney - City and Inner South | 66214 | SYDNEY (OBSERVATORY HILL) | 2017 - 2024 | N | BOM data range too small |
| 117 | Sydney - City and Inner South | 66022 | FORT DENISON | 2010 - 2024 | N | Fort Denison is an island and likely not a true representation of weather conditions on the mainland |
| 118 | Sydney - Eastern Suburbs | 66051 | LITTLE BAY (THE COAST GOLF CLUB) | 2007 - 2024 | N | Incomplete BOM data (no maximum temperature) |
| 119 | Sydney - Inner South West | 66194 | CANTERBURY RACECOURSE AWS | 2007 - 2024 | Y | Only representative weather station available for Inner South West SA4 119 |
| 119 | Sydney - Inner South West | 66137 | BANKSTOWN AIRPORT AWS | 2007 - 2024 | N | Airport is possibly not representative of normal weather conditions in this SA4 due to required infrastructure and tree clearance |
| 120 | Sydney - Inner West |  |  |  | N | No BOM weather station in this SA4 |
| 121 | Sydney - North Shore and Hornsby |  |  |  | N | No BOM weather station in this SA4 |
| 122 | Sydney - Northern Beaches | 66197 | North Head | 2010 - 2024 | N | Incomplete BOM data (no maximum temperature) |
| 122 | Sydney - Northern Beaches | 66059 | TERREY HILLS AWS | 2007 - 2024 | Y | Only complete weather station available for Northern Beaches SA4 122 |
| 123 | Sydney - Outer South West | 68263 | HOLSWORTHY DEFENCE AWS | 2017 - 2024 | N | BOM data range too small |
| 123 | Sydney - Outer South West | 68257 | CAMPBELLTOWN (MOUNT ANNAN) | 2007 - 2024 | Y | Only complete weather station available for Outer South West SA4 123 |
| 124 | Sydney - Outer West and Blue Mountains | 67113 | PENRITH LAKES AWS | 2007 - 2024 | Y | Only representative weather station available for Outer West and Blue Mountains SA4 124 |
| 124 | Sydney - Outer West and Blue Mountains | 67105 | RICHMOND RAAF | 2007 - 2024 | N | Airport is possibly not representative of normal weather conditions in this SA4 due to required infrastructure and tree clearance |
| 125 | Sydney - Parramatta | 66212 | SYDNEY OLYMPIC PARK AWS (ARCHERY CENTRE) | 2011 - 2024 | N | Sports centre is possibly not representative of normal weather conditions in this SA4 due to required infrastructure |
| 125 | Sydney - Parramatta | 66124 | PARRAMATTA NORTH (MASONS DRIVE) | 2007 - 2024 | Y | Only representative weather station available for Parramatta SA4 125 |
| 126 | Sydney - Ryde |  |  |  | N | No BOM weather station in this SA4 |
| 127 | Sydney - South West | 68192 | CAMDEN AIRPORT AWS | 2007 - 2024 | N | Airport is possibly not representative of normal weather conditions in this SA4 due to required infrastructure and tree clearance |
| 127 | Sydney - South West | 66161 | HOLSWORTHY AERODROME AWS | 2012 - 2024 | N | Airport is possibly not representative of normal weather conditions in this SA4 due to required infrastructure and tree clearance |
| 127 | Sydney - South West | 67108 | BADGERYS CREEK AWS | 2007 - 2024 | Y | Only representative weather station available for South West SA4 127 |
| 127 | Sydney - South West | 67119 | HORSLEY PARK EQUESTRIAN CENTRE AWS | 2007 - 2024 | N | Sports centre is possibly not representative of normal weather conditions in this SA4 due to required infrastructure |
| 128 | Sydney - Sutherland | 66023 | LUCAS HEIGHTS (ANSTO) - 66078 | 2007 - 2024 | N | Incomplete BOM data (no maximum temperature) |
| 128 | Sydney - Sutherland | 66208 | WATTAMOLLA AWS | 2010 - 2024 | N | Incomplete BOM data (no maximum temperature) |
