# Supplementary material
Source: Research Square preprint supplement (doi:10.21203/rs.3.rs-9410031/v1)
Supplement: Supplementary file 4 [file fcf7c710c4e518c9ef6179b2.docx]

| Condition Group | ICD Codes |
| --- | --- |
| 'Mental and behavioural disorders ' | refers to codes:  F03, F05.1, F05.9, F07.2, F09, F10.0, F10.2, F10.3, F10.9, F11.0, F11.2, F11.3, F11.9, F12.0, F12.2, F12.3, F12.9, F13.01, F13.21, F13.31, F13.90, F14.0, F14.2, F14.3, F14.9, F15.01, F15.02, F15.21, F15.22, F15.31, F15.32, F15.90, F16.01, F16.21, F16.31, F16.90, F17.9, F18.0, F18.2, F18.3, F18.9, F19.0, F19.2, F19.3, F19.9, F20.9, F22.9, F23.90, F25.9, F29, F30.9, F31.9, F32.90, F33.9, F39, F41.0, F41.2, F41.9, F43.0, F43.1, F43.2, F43.9, F44.9, F45.9, F48.9, F50.0, F50.9, F53.9, F55.9, F60.9, F69, F89, F91.9, F93.9, F98.9, F99 |
| 'Mental and behavioural disorders due to psychoactive substance use' | refers to codes:  F10.0, F10.2, F10.3, F10.9, F11.0, F11.2, F11.3, F11.9, F12.0, F12.2, F12.3, F12.9, F13.01, F13.21, F13.31, F13.90, F14.0, F14.2, F14.3, F14.9, F15.01, F15.02, F15.21, F15.22, F15.31, F15.32, F15.90, F16.01, F16.21, F16.31, F16.90, F17.9, F18.0, F18.2, F18.3, F18.9, F19.0, F19.2, F19.3, F19.9 |
| 'Mood (affective) disorders' | refers to codes:  F30.9, F31.9, F32.90, F33.9, F39 |
| 'Neurotic, stress-related and somatoform disorders' | refers to codes:  F41.0, F41.2, F41.9, F43.0, F43.1, F43.2, F43.9, F44.9, F45.9, F48.9 |
